# Supplementary material
Source: PubMed Central journal article supplement (PMC5502201)

**Supplementary Table 1:** Local peaks of significant clusters (corrected  $P$ -value $<.05$ ) showing reduced gray matter in 44 large TICV controls compared to 44 small TICV controls before correcting for TICV. No areas survived TICV correction. BA-Broadmann area.

| Cluster | Voxels | Brain Region              | Side | BA     | MNI (mm) |     |     |
|---------|--------|---------------------------|------|--------|----------|-----|-----|
|         |        |                           |      |        | x        | y   | z   |
| 1       | 12612  | Hippocampus               | R    | 20, 37 | 32       | -36 | -4  |
|         |        | Fusiform                  | R    | 19     | 28       | -62 | -10 |
|         |        | ParaHippocampus           | L    | 30     | -28      | -30 | -18 |
|         |        | Parahippocampus           | R    | 30     | 26       | -22 | -20 |
|         |        | Cerebellum                | L    | -      | -26      | -40 | -44 |
|         |        | Cerebellum                | R    | -      | 24       | -68 | -38 |
|         |        | Thalamus                  | L    | -      | -4       | -14 | 0   |
|         |        | Thalamus                  | R    | -      | 2        | -6  | 6   |
|         |        | Superior Temporal Lobe    | R    | 22     | 64       | -20 | 14  |
| 2       | 645    | Inferior Parietal Lobe    | L    | 40     | -44      | -48 | 42  |
|         |        | Angular Gyrus             | L    | 39     | -52      | -62 | 36  |
|         |        | Superior Temporal Lobe    | L    | 22     | -64      | -50 | 18  |
| 3       | 127    | Postcentral Gyrus         | R    | 43     | 66       | -12 | 26  |
| 4       | 124    | Insula                    | L    | 48     | -40      | 6   | -14 |
|         |        | Middle Temporal Lobe      | L    | 21     | -48      | -2  | -16 |
| 5       | 48     | Anterior Cingulate Cortex | -    | 24     | 8        | 34  | 16  |
| 6       | 48     | Anterior Cingulate Cortex | -    | 24     | -44      | -34 | 2   |
| 7       | 47     | Insula                    | R    | 48     | 38       | 4   | 4   |
| 8       | 15     | Middle Temporal Lobe      | L    | 21     | -52      | -50 | 16  |

**Supplementary Fig. 1** FSL-VBM results of 88 control participants split between those with large and small TICV before controlling covariates. Contrast T map shows significant clusters ( $p < .05$ , FWE corrected) where large TICV participants showed smaller volumes than small TICV. Neurological convention (L is L).

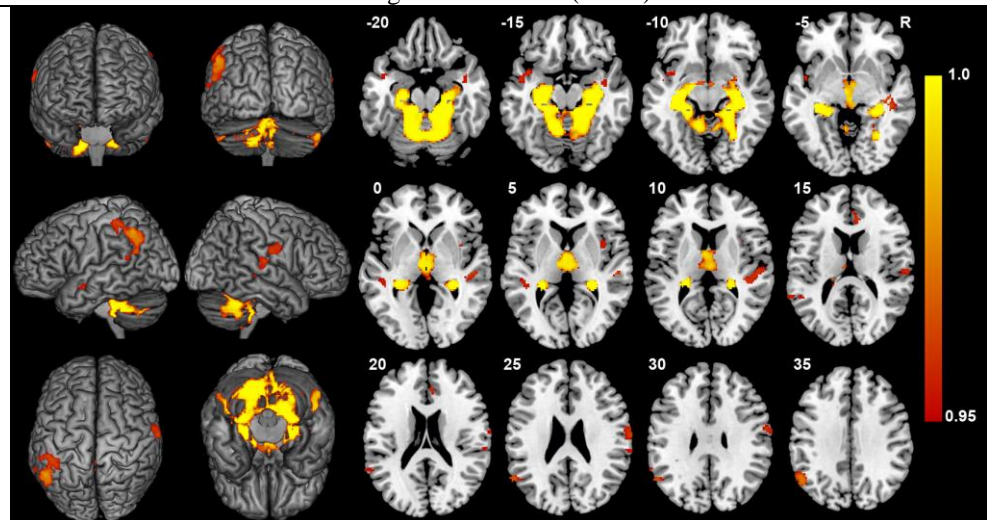

Supplement: NIHMS826576-supplement-01.pdf [file NIHMS826576-supplement-01.pdf]
